# Supplementary material
Source: PubMed Central journal article supplement (PMC2759377)

# European Journal of Immunology

**Supporting Information**

**for**

**Eur. J. Immunol. 10.1002/eji.200837902**

**Interleukin-10-induced MARCH1 mediates intracellular sequestration  
of MHC class II in monocytes**

Jacques Thibodeau, Marie-Claude Bourgeois-Daigneault, Gabrielle Huppé,  
Jessy Tremblay, Angélique Aumont, Mathieu Houde, Eric Barteel, Alexandre Brunet,  
Marie-Elaine Gauvreau, Aude de Gassart, Evelina Gatti, Martin Baril, Maryse  
Cloutier, Séverine Bontron, Klaus Früh, Daniel Lamarre and Viktor Steimle

**Supplemental Table I. Oligonucleotides used for quantitative PCR analysis**

| Gene          | Oligonucleotides   | Sequence              |
|---------------|--------------------|-----------------------|
| <i>HPRT</i>   | hsHPRT F2          | GACTTTGCTTTCCTTGGTCA  |
|               | hsHPRT R2          | GGCTTTGTATTTTGCTTTTCC |
| <i>MARCH1</i> | hsMARCH1 E1-258 F1 | TCCCAGGAGCCAGTCAAGGTT |
|               | hsMARCH1 E2-385 R1 | CAAAGCGCAGTGTCCCAGTG  |
| <i>MARCH2</i> | hsMARCH2-S3        | GTCTCCTTCCGCTACCACTG  |
|               | hsMARCH2-AS3       | TGTCTCCTCTGCCACCTTCT  |
| <i>MARCH8</i> | hsMARCH8 ORF298 F1 | ACAGGAAGCCTCCACTTCG   |
|               | hsMARCH8 ORF489 R1 | GACGTGGAATGTCCTGAG    |

**Supplemental Figure legends.**

**Figure S1. Intracellular retention of MHC-II molecules in monocytes treated with IFN- $\gamma$  and IL-10.** Primary human monocytes treated with IFN- $\gamma$  alone (A, upper panels) or with IFN- $\gamma$  and IL-10 (B, lower panels) for 16 h were fixed, permeabilized and stained simultaneously for HLA-DM (left panels) and HLA-DR (middle panels), and analyzed by confocal microscopy. The panels on the right show the merge of fluorescent signals. The bar corresponds to 20  $\mu$ m. HLA-DM molecules are localized in endosomal intracellular MHC-II loading compartments (MIICs).

**Figure S2. MARCH1 and MARCH8 down-regulate HLA-DR, -DP and -DQ.** 293EBNA/CIITA cells were transiently transfected either with empty expression vector (open profiles), or with MARCH1 (filled profiles in left panels), or MARCH8 (right panels). Cells were stained after 48 h for surface expression of HLA-DR (mAb L243; panels 1, 2), HLA-DQ (mAb SPV-L3, panels 3, 4), or HLA-DP (mAb B7/21; panels 5, 6) and analyzed by flow cytometry.

**Figure S3. Down-regulation of wild-type but not lysine-225 mutated HLA-DR $\alpha$ / $\beta$  by EYFP-MARCH1.** 293EBNA cells were transiently co-transfected with wild-type HLA-DR $\alpha$  and HLA-DR $\beta$  constructs (lanes 1, 2), or with HLA-DR $\beta$  constructs carrying a lysine-to-alanine mutation at position 225 (K225A, lanes 3, 4), together with either an EYFP expression vector (lanes 1, 3), or with an expression vector expressing an EYFP-MARCH1 fusion protein (lanes 2, 4) and analyzed 48 h after transfection by flow cytometry for HLA-DR cell surface expression with mAb L243. When co-transfected with MARCH1, MHC-II molecules with a wild-type lysine at position HLA-DR $\beta$ 225 were efficiently down-regulated from the plasma membrane (lane 2), while molecules with the HLA-DR $\beta$ (K225A) mutation showed strongly reduced down-regulation in the presence of MARCH1 protein (lane 4). Mean fluorescence values and standard errors are derived from duplicates of independent transfections.

Figure S1.

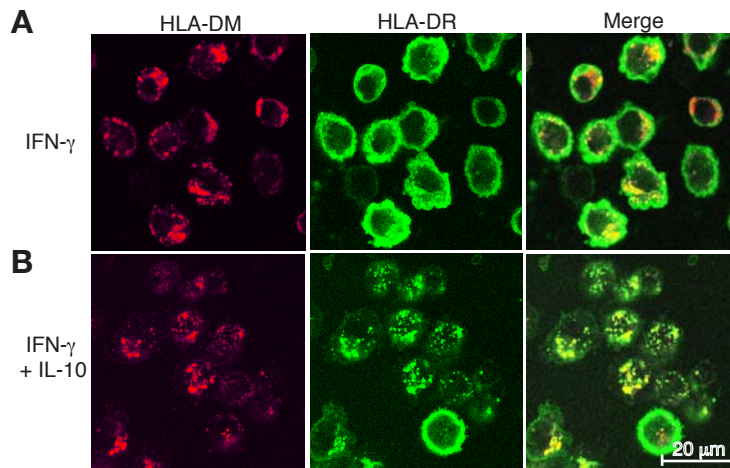

Figure S2.

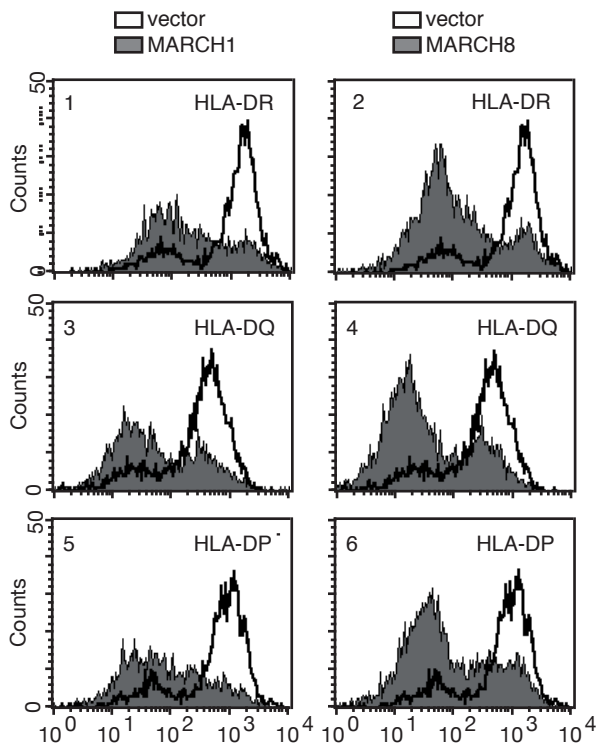

Figure S3.

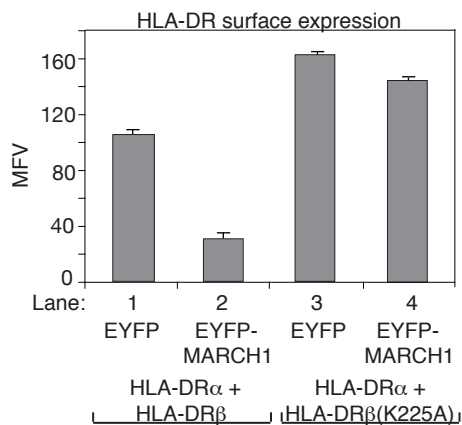

Supplement: NIHMS140922-supplement-Supplemental_data.pdf [file NIHMS140922-supplement-Supplemental_data.pdf]
